# Supplementary material for: A field guide for the compositional analysis of any-omics data
Source: PubMed Central journal article supplement (PMC6755255; doi:10.1093/gigascience/giz107), 2019-09-23
Supplement: giz107_response_to_reviewer_comments_revision_2.pdf [file giz107_response_to_reviewer_comments_revision_2.pdf]

## Author's Response To Reviewer Comments

Close

Revisions provided as requested by Scott.

Close
